# Supplementary material for: Chrysin-Induced Regression of Angiogenesis via an Induction of DNA Damage Response and Oxidative Stress in In Vitro and In Vivo Models of Melanoma
Source: MDPI journal article supplement (doi:10.3390/cells12121561), 2023-06-06
Supplement: s1 [file s1]

# Supplementary materials

Supplementary Table S1. Antibodies

| Epitope                     | Supplier       | Reference | Isotype | kDa     | Dilution | Diluent       |
|-----------------------------|----------------|-----------|---------|---------|----------|---------------|
| ATM                         | Cell signaling | #2873     | Rabbit  | 350     | 1/1000   | BSA 5%        |
| pS1981-ATM                  | abcam          | Ab 81292  | Rabbit  | 370     | 1/50 000 | BSA 5%        |
| ATR                         | Santa Cruz     | Sc-1887   | Chèvre  | 250     | 1/200    | Milk 5%       |
| pS428-ATR                   | Cell signaling | #2853     | Rabbit  | 300     | 1/1000   | BSA 5%        |
| Chk1                        | Santa Cruz     | Sc-8408   | Mouse   | 56      | 1/1000   | Milk 5%       |
| pS345-Chk1                  | Cell signaling | #2341     | Rabbit  | 56      | 1/1000   | BSA 5%        |
| Chk2                        | Millipore      | 05-649    | Mouse   | 67      | 1/1000   | Milk 5%       |
| pT68-Chk2                   | Abcam          | Ab 3501   | Rabbit  | 61      | 1/500    | Milk 5%       |
| p53                         | Cell signaling | #2527     | Rabbit  | 53      | 1/1000   | BSA 5%        |
| pS15-p53                    | Cell signaling | #9284     | Rabbit  | 53      | 1/1000   | Milk 5%       |
| p21 <sup>Cip1</sup>         | Santa cruz     | Sc-756    | Rabbit  | 21      | 1/500    | Milk/BSA 2,5% |
| pS139-H2AX ( $\gamma$ H2AX) | Santa cruz     | Sc-10169  | Rabbit  | 15      | 1/500    | BSA 5%        |
| PARP                        | Cell signaling | #9542     | Rabbit  | 116,89  | 1/1000   | Milk 5%       |
| GAPDH                       | Sigma Aldrich  | G9545     | Rabbit  | 36      | 1/1000   | Milk 5%       |
| VEGFR2                      | Cell signaling | #2479     | Rabbit  | 210,230 | 1/1000   | BSA 5%        |
| Hif1 $\alpha$               | Cell signaling | #14179    | Rabbit  | 120     | 1/1000   | BSA 5%        |
| Hif1 $\beta$                | Abcam          | Ab 2771   | Mouse   | 87      | 1/4000   | Milk 5%       |
| STAT3                       | Cell signaling | #4904     | Rabbit  | 79,86   | 1/2000   | BSA 5%        |
| pY705-STAT3                 | Cell signaling | #9145     | Rabbit  | 79,86   | 1/2000   | BSA 5%        |
| VEGF-A                      | Santa cruz     | Sc-7269   | Mouse   | 21,42   | 1/200    | Milk 5%       |
| Anti-Mouse IgG HRP          | Sigma Aldrich  | A0168     | Goat    |         | 1/10000  | Milk 5%       |
| Anti-Rabbit IgG HRP         | Cell signaling | #7074     | Goat    |         | 1/2500   | Milk 5%       |
| Anti-Goat IgG HRP           | Dako           | PO449     | Rabbit  |         | 1/4000   | Milk 5%       |

Supplementary Table S2. Primers used for RT-qPCR analysis

| Gene                          | Species | Forward sequence       | Reverse sequence          |
|-------------------------------|---------|------------------------|---------------------------|
| <i>VEGFA</i> (VEGF-A)         | Human   | TTCATGGATGTCTATCAGCG   | CATCTCTCCTATGTGCTGGC      |
| <i>GAPDH</i> (GAPDH)          | Human   | AGATCCCTCCAAAATCAAGTGC | GGCAGAGATGATGACCCTTTT     |
| <i>Vefgr1</i> (VEGFR2)        | Mouse   | GAGGAGGATGAGGGTGTCTAT  | GTGATCAGCTCCAGGTTTGAC     |
| <i>Vefgr2</i> (VEGFR2)        | Mouse   | GCAAAACACTCACCATTCCCA  | GAGGTTTGAAATCGACCCCTCG    |
| <i>Vegfa</i> (VEGF-A)         | Mouse   | AATGCTTTCTCTGAA        | GCTTCTACAGCACAGCACA       |
| <i>Hif1a</i> (HIF1 $\alpha$ ) | Mouse   | TCTCGGCGAAGCAAAGAGTC   | AGCCATCTAGGGCTTTCAGATAA   |
| <i>Epas1</i> (HIF2 $\alpha$ ) | Mouse   | ACTGGGAGGCATAGCACTGT   | TAAAGCGGCAGCTGGAGTAT      |
| <i>Stat3</i> (STAT3)          | Mouse   | CTGCTCCAGGTAGCGTGTGT   | CTCAGCCCCCGGAGACAGT       |
| <i>Nrf2</i> (NRF2)            | Mouse   | TAGATGACCATGAGTCGCTTGC | GCCAAACTTGCTCCATGTCC      |
| <i>Nrf1</i> (NRF1)            | Mouse   | AGCACCGAGAGACCCAAAC    | TGTACGTGGCTACATGGACCT     |
| <i>Prdx4</i> (PRDX4)          | Mouse   | CCACCAGCGTAGAAGTGGC    | GTTCTGTGTGCGGACCGAAT      |
| <i>Cat</i> (CATALASE)         | Mouse   | GCTGAAGTTGAACAGATG     | GTCATCAGCGTGAGTCTG        |
| <i>Gpx</i> (GPX)              | Mouse   | CCCTAGGAGAATGGCAAG     | CAGAGTGCAGCCAGTAATCACCAAG |
| <i>Sod1</i> (SOD1)            | Mouse   | GACCTGGGCAATGTGACTGCTG | CACCAGTGTACGGCCAATGATG    |
| <i>Gapdh</i> (GAPDH)          | Mouse   | GTTGTCTCCTGCGACTTCA    | GGTGGTCCAGGGTTTCTTA       |

Supplementary Figure S1.

**A)**

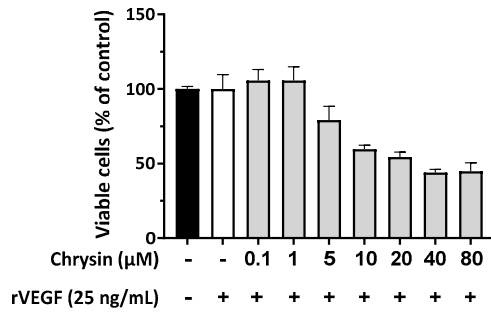

**B)**

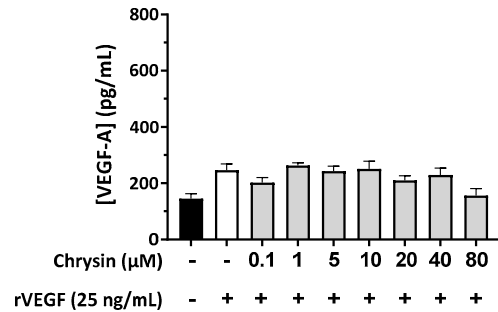

**C)**

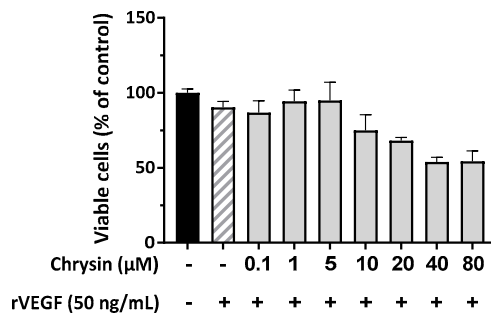

**D)**

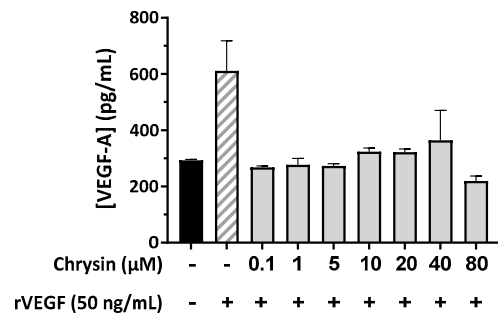

**Supplementary Figure S1. Effects of Chrysin on VEGF-A secretion in Human Umbilical Vein Endothelial Cells (HUVEC).** HUVEC cells were seeded in 48-well plates (15,000 cells per well) in EBM media (CC-3129 without phenol red, Lonza®) supplemented with EGM SingleQuots (CC-4133, Lonza®) and incubated 24h for cells adhesion. The next day, cells were pretreated without (vehicle control, DMSO 0.05% v/v) or with increasing concentrations of chrysin (0.1, 1, 5, 10, 20, 40 and 80 µM) for 24h. After chrysin pretreatment, cells were either incubated for additional 24h with human recombinant VEGF-165 (rVEGF, 11858821, Invitrogen) at 25 (**A, B**) or 50 ng/mL (**C, D**), or treated with vehicle alone (0.1 % water). At the end of the experiment, cells supernatants were collected and the secreted levels of VEGF were quantified by ELISA (Human VEGF ELISA MAX™ Deluxe set, 446504, Biolegend). **B and D**), Data are expressed as a mean ± SEM in pg/mL from one independent experiment with 3 biological replicates per condition. **A and B**), cells viability was assessed in treated wells by crystal violet staining. Data are expressed as a mean percentage relative to control cells (treated with vehicles alone) ± SEM.
